# Supplementary material for: Efficient organic light-emitting diodes based on iridium(iii) complexes containing indolo[3,2,1-jk]carbazole derivatives with narrow emission bandwidths and low efficiency roll-offs
Source: Royal Society of Chemistry journal article supplement (doi:10.1039/d1tc01449h), 2021-01-01
Supplement: d1tc01449h1.pdf [file d1tc01449h1.pdf]

## Supporting Information (SI)

### **Efficient organic light-emitting diodes based on iridium(III) complexes containing indolo[3,2,1-*jk*]carbazole derivatives with narrow emission bandwidths and low efficiency roll offs**

Xiang-Ji Liao,<sup>1#</sup> Jin-Jun Zhu,<sup>1#</sup> Li Yuan,<sup>1</sup> Zhi-Ping Yan,<sup>1</sup> Xu-Feng Luo,<sup>1</sup> Yi-Pin Zhang,<sup>1</sup> Jun-Jian Lu,<sup>1</sup> and You-Xuan Zheng<sup>1,2\*</sup>

<sup>1</sup>State Key Laboratory of Coordination Chemistry, Jiangsu Key Laboratory of Advanced Organic Materials, School of Chemistry and Chemical Engineering, Nanjing University, Nanjing 210093, P. R. China. E-mail: yxzheng@nju.edu.cn.

<sup>2</sup>Shenzhen Research Institute of Nanjing University, Shenzhen 518057, P. R. China.

#Liao and Zhu have same contribution to this paper.

## S1. General information

NMR measurements were conducted on a Bruker AM 400 spectrometer. High resolution electrospray mass spectra (HRMS) was measured on G6500 from Agilent for complexes. Absorption spectra were measured on a UV-3100 spectrophotometer and photoluminescence spectra were obtained from a Hitachi F-4600 photoluminescence spectrophotometer. Cyclic voltammetry measurements were conducted on a MPI-A multifunctional electrochemical and chemiluminescent system (Xi'an Remex Analytical Instrument Ltd. Co., China) at room temperature, with a polished Pt plate as the working electrode, platinum thread as the counter electrode and Ag-AgNO<sub>3</sub> (0.1 M) in CH<sub>3</sub>CN as the reference electrode, tetra-*n*-butylammonium perchlorate (0.1 M) was used as the supporting electrolyte, using Fc<sup>+</sup> /Fc as the internal standard, the scan rate was 0.1 V/s. The absolute photoluminescence quantum yields ( $\Phi$ ) and the decay lifetimes of the compounds was measured with HORIBA FL-3 fluorescence spectrometer. Thermogravimetric analysis (TGA) was performed on a Pyris 1 DSC under nitrogen at a heating rate of 10 °C min<sup>-1</sup>. The single crystals of complexes were carried out on a Bruker SMART CCD diffractometer using monochromated Mo K $\alpha$  radiation ( $\lambda = 0.71073 \text{ \AA}$ ) at room temperature. Cell parameters were retrieved using SMART software and refined using SAINT on all observed reflections.

## S2. OLEDs fabrication and measurement.

All OLEDs were fabricated on the pre-patterned ITO-coated glass substrate with a sheet resistance of 15  $\Omega \text{ sq}^{-1}$ . The deposition rate for organic compounds is 1-2  $\text{\AA s}^{-1}$ . The phosphor and the host (2,6DCzPPy) was co-evaporated to form emitting layer from two separate sources. The cathode consisting of LiF / Al was deposited by evaporation of LiF with a deposition rate of 0.1  $\text{\AA s}^{-1}$  and then by evaporation of Al metal with a rate of 3  $\text{\AA s}^{-1}$ .

The characteristic curves of the devices were measured with a computer which controlled KEITHLEY 2400 source meter with a calibrated silicon diode in air without device encapsulation. On the basis of the uncorrected PL and EL spectra, the Commission Internationale de l'Eclairage (CIE) coordinates were calculated using a test program of the Spectra scan PR650 spectrophotometer, The EQE of EL devices were calculated based on the photo energy measured by the photodiode.

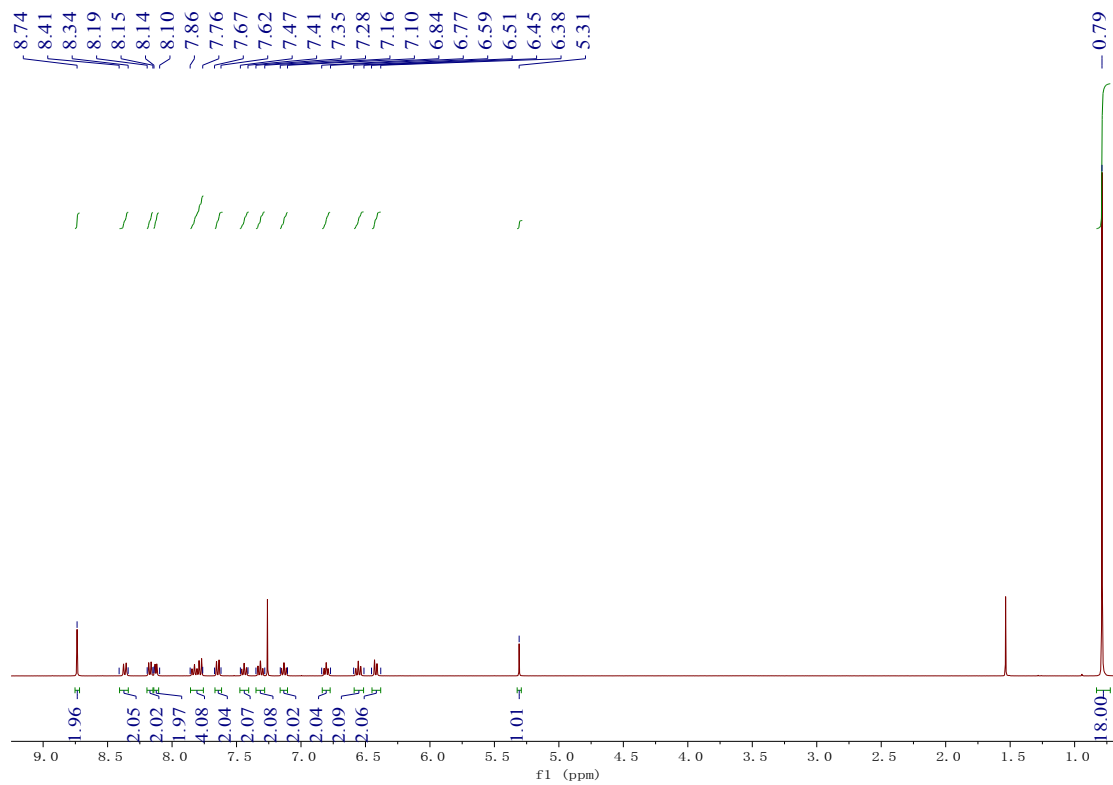

**Fig. S1**  $^1\text{H}$  NMR spectrum of  $(\text{pyidcz})_2\text{Ir}(\text{tmd})$  complex.

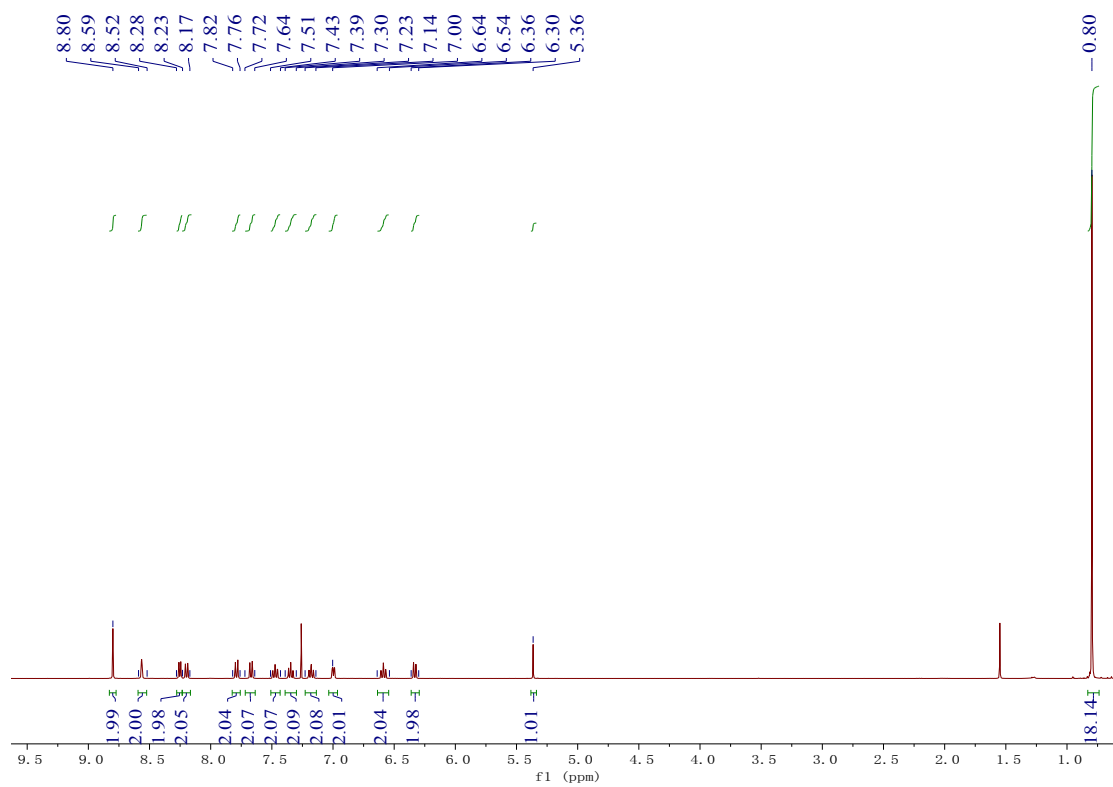

**Fig. S2**  $^1\text{H}$  NMR spectrum of  $(\text{tfpyidcz})_2\text{Ir}(\text{tmd})$  complex.

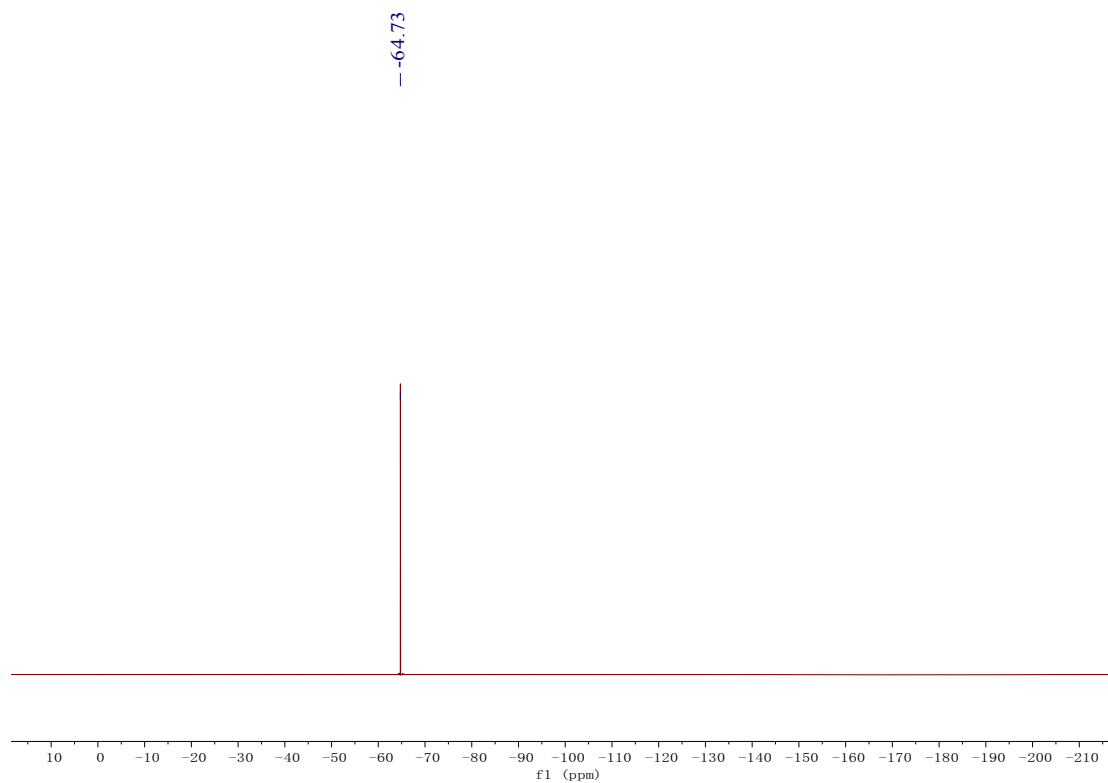

**Fig. S3**  $^{19}\text{F}$  NMR spectrum of  $(\text{tfpyidcz})_2\text{Ir}(\text{tmd})$  complex.

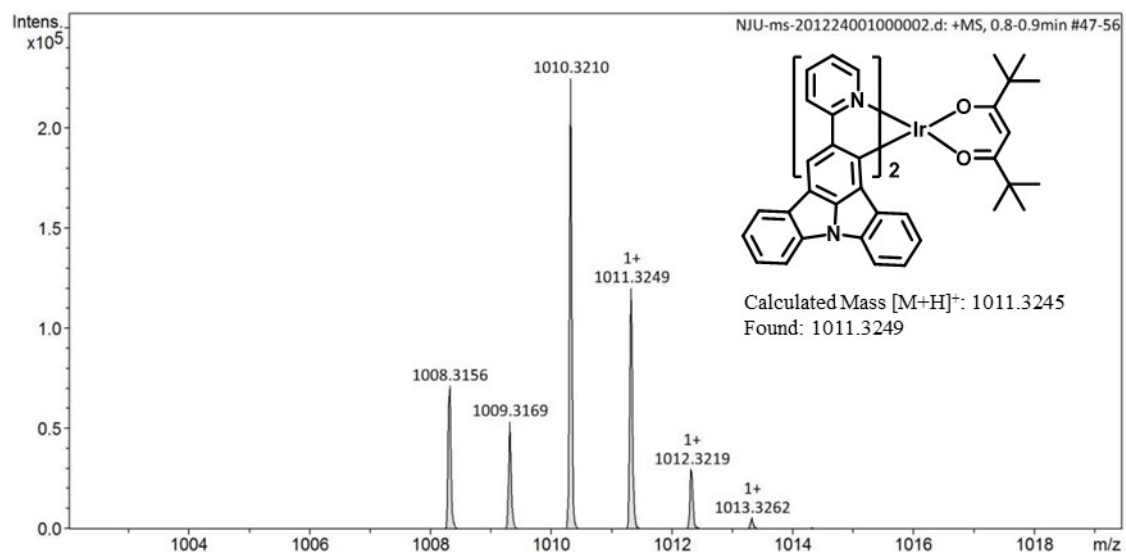

**Fig. S4** HRMS spectrum of  $(\text{pyidcz})_2\text{Ir}(\text{tmd})$  complex.

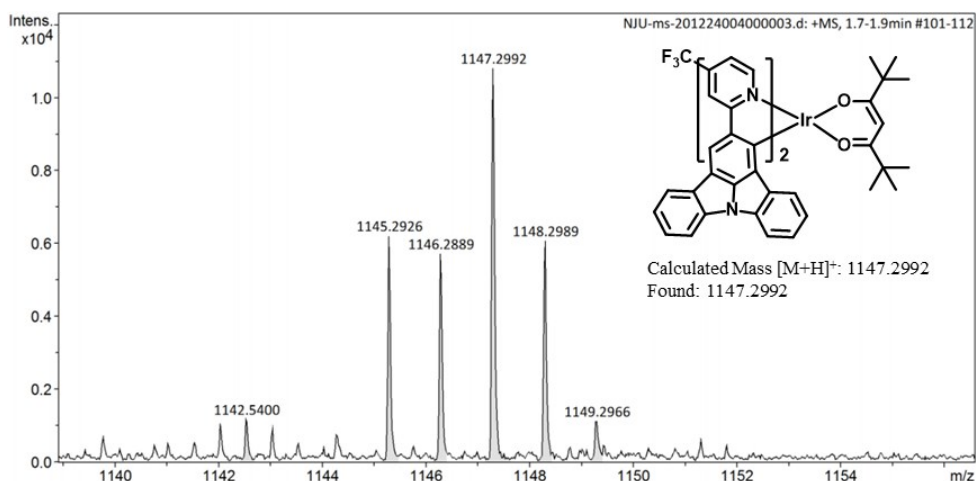

**Fig. S5** HRMS spectrum of (tfpyidcz)<sub>2</sub>Ir(tmd) complex.

**Table S1.** Crystal information of (pyidcz)<sub>2</sub>Ir(tmd) and (tfpyidcz)<sub>2</sub>Ir(tmd) complexes.

|                                                                                                                | (pyidcz) <sub>2</sub> Ir(tmd)                                   | (tfpyidcz) <sub>2</sub> Ir(tmd)                                                |
|----------------------------------------------------------------------------------------------------------------|-----------------------------------------------------------------|--------------------------------------------------------------------------------|
| Formula                                                                                                        | C <sub>57</sub> H <sub>45</sub> IrN <sub>4</sub> O <sub>2</sub> | C <sub>59</sub> H <sub>43</sub> F <sub>6</sub> IrN <sub>4</sub> O <sub>2</sub> |
| Formula weight                                                                                                 | 1010.17                                                         | 1146.17                                                                        |
| <i>T</i> (K)                                                                                                   | 189.99                                                          | 192.99                                                                         |
| Wavelength (Å)                                                                                                 | 1.34139                                                         | 1.34139                                                                        |
| Crystal system                                                                                                 | Triclinic                                                       | Monoclinic                                                                     |
| Space group                                                                                                    | <i>P</i> -1                                                     | <i>P</i> 2 <sub>1</sub> / <i>n</i>                                             |
| <i>a</i> (Å)                                                                                                   | 13.4272(4)                                                      | 15.4399(7)                                                                     |
| <i>b</i> (Å)                                                                                                   | 19.5665(6)                                                      | 19.6457(9)                                                                     |
| <i>c</i> (Å)                                                                                                   | 19.8361(6)                                                      | 18.3164(8)                                                                     |
| $\alpha$ (deg)                                                                                                 | 66.9160(10)                                                     | 90                                                                             |
| $\beta$ (deg)                                                                                                  | 82.6740(10)                                                     | 102.973(2)                                                                     |
| $\gamma$ (deg)                                                                                                 | 71.3750(10)                                                     | 90                                                                             |
| <i>V</i> (Å <sup>3</sup> )                                                                                     | 4543.0(2)                                                       | 5414.1(4)                                                                      |
| <i>Z</i>                                                                                                       | 4                                                               | 4                                                                              |
| $\rho_{\text{calcd}}$ (mg m <sup>-3</sup> )                                                                    | 1.477                                                           | 1.406                                                                          |
| $\mu$ (Mo K $\alpha$ ) (mm <sup>-1</sup> )                                                                     | 4.189                                                           | 3.664                                                                          |
| <i>F</i> (000)                                                                                                 | 2032                                                            | 2288                                                                           |
| Reflns collected                                                                                               | 40573                                                           | 35473                                                                          |
| Unique                                                                                                         | 16116                                                           | 9859                                                                           |
| Data/restraints/params                                                                                         | 16116/6/1165                                                    | 9859 / 51 / 683                                                                |
| GOF on <i>F</i> <sup>2</sup>                                                                                   | 1.064                                                           | 1.032                                                                          |
| <i>R</i> <sub>1</sub> <sup>a</sup> , <i>wR</i> <sub>2</sub> <sup>b</sup> [ <i>I</i> > 2 $\sigma$ ( <i>I</i> )] | 0.0598, 0.1424                                                  | 0.0413, 0.1010                                                                 |
| <i>R</i> <sub>1</sub> <sup>a</sup> , <i>wR</i> <sub>2</sub> <sup>b</sup> (all data)                            | 0.0798, 0.1579                                                  | 0.0548, 0.1089                                                                 |
| CCDC NO                                                                                                        | 2052163                                                         | 2052136                                                                        |

$$R_1^a = \frac{\sum ||F_o| - |F_c||}{\sum F_o}, \quad wR_2^b = \left[ \frac{\sum w(F_o^2 - F_c^2)^2}{\sum w(F_o^2)} \right]^{1/2}$$

**Table S2.** Selected bond lengths and angles of (pyidcz)<sub>2</sub>Ir(tmd) complex.

| Selected bonds (Å)   |           |                      |           |
|----------------------|-----------|----------------------|-----------|
| Ir(01)-O(005)        | 2.143(5)  | Ir(01)-N(007)        | 2.017(5)  |
| Ir(01)-O(006)        | 2.115(5)  | Ir(01)-N(008)        | 2.016(6)  |
| Ir(01)-C(009)        | 1.989(7)  | Ir(01)-C(00A)        | 1.979(6)  |
| Ir(02)-O(003)        | 2.124(5)  | Ir(02)-O(004)        | 2.122(4)  |
| Ir(02)-N(00B)        | 2.008(7)  | Ir(02)-N(00C)        | 2.025(7)  |
| Ir(02)-C(00K)        | 1.992(7)  | Ir(02)-C(012)        | 1.997(7)  |
| Selected angles (°)  |           |                      |           |
| O(006)-Ir(01)-O(005) | 86.61(19) | N(007)-Ir(01)-O(005) | 93.3(2)   |
| N(007)-Ir(01)-O(006) | 85.9(2)   | N(008)-Ir(01)-O(005) | 83.9(2)   |
| N(008)-Ir(01)-O(006) | 93.7(2)   | N(008)-Ir(01)-N(007) | 177.2(2)  |
| C(009)-Ir(01)-O(005) | 170.0(2)  | C(009)-Ir(01)-O(006) | 84.9(2)   |
| C(009)-Ir(01)-N(007) | 81.0(2)   | C(009)-Ir(01)-N(008) | 101.8(2)  |
| C(00A)-Ir(01)-O(005) | 88.1(2)   | C(00A)-Ir(01)-O(006) | 173.1(2)  |
| C(00A)-Ir(01)-N(007) | 98.9(2)   | C(00A)-Ir(01)-N(008) | 81.3(2)   |
| C(00A)-Ir(01)-C(009) | 100.7(3)  | O(004)-Ir(02)-O(003) | 87.41(19) |
| N(00B)-Ir(02)-O(003) | 84.0(2)   | N(00B)-Ir(02)-O(004) | 92.2(2)   |
| N(00B)-Ir(02)-N(00C) | 174.4(2)  | N(00C)-Ir(02)-O(003) | 93.2(2)   |
| N(00C)-Ir(02)-O(004) | 82.8(2)   | C(00K)-Ir(02)-O(003) | 172.3(3)  |
| C(00K)-Ir(02)-O(004) | 87.5(2)   | C(00K)-Ir(02)-N(00B) | 101.9(3)  |
| C(00K)-Ir(02)-N(00C) | 80.5(3)   | C(00K)-Ir(02)-C(012) | 99.0(3)   |
| C(012)-Ir(02)-O(003) | 86.7(2)   | C(012)-Ir(02)-O(004) | 171.4(3)  |
| C(012)-Ir(02)-N(00B) | 81.0(3)   | C(012)-Ir(02)-N(00C) | 103.7(3)  |

**Table S3.** Selected bond lengths and angles of (tfpyidcz)<sub>2</sub>Ir(tmd) complex.

| Selected bonds (Å)   |            |                      |            |
|----------------------|------------|----------------------|------------|
| Ir(01)-O(001)        | 2.141(3)   | Ir(01)-O(002)        | 2.126(3)   |
| Ir(01)-N(002)        | 2.011(3)   | Ir(01)-N(004)        | 2.013(3)   |
| Ir(01)-C(003)        | 1.989(4)   | Ir(01)-C(004)        | 1.999(4)   |
| Selected angles (°)  |            |                      |            |
| O(002)-Ir(01)-O(001) | 87.81(11)  | N(002)-Ir(01)-O(001) | 94.30(13)  |
| N(002)-Ir(01)-O(002) | 80.26(12)  | N(002)-Ir(01)-N(004) | 172.35(13) |
| N(004)-Ir(01)-O(001) | 80.05(12)  | N(004)-Ir(01)-O(002) | 94.30(12)  |
| C(003)-Ir(01)-O(001) | 173.90(14) | C(003)-Ir(01)-O(002) | 86.97(14)  |
| C(003)-Ir(01)-N(002) | 81.71(15)  | C(003)-Ir(01)-N(004) | 103.49(15) |

|                      |            |                      |            |
|----------------------|------------|----------------------|------------|
| C(003)-Ir(01)-C(004) | 96.20(16)  | C(004)-Ir(01)-O(001) | 89.23(14)  |
| C(004)-Ir(01)-O(002) | 175.01(13) | C(004)-Ir(01)-N(002) | 103.98(15) |
| C(004)-Ir(01)-N(004) | 81.22(15)  |                      |            |

**Table S4.** HOMO and LUMO electron cloud density distributions of each fragment of two Ir(III) complexes.

| Complex                         | Orbital | Energy/ eV | $E_g$ / eV | Composition (%) |             |                  |
|---------------------------------|---------|------------|------------|-----------------|-------------|------------------|
|                                 |         |            |            | Ir              | Main ligand | Ancillary ligand |
| (pyidcz) <sub>2</sub> Ir(tmd)   | HOMO    | -4.91      | 3.47       | 36.36           | 60.12       | 3.52             |
|                                 | LUMO    | -1.44      |            | 3.39            | 93.45       | 3.16             |
| (tfpyidcz) <sub>2</sub> Ir(tmd) | HOMO    | -5.27      | 2.70       | 31.44           | 65.20       | 3.35             |
|                                 | LUMO    | -2.57      |            | 3.88            | 94.52       | 1.69             |

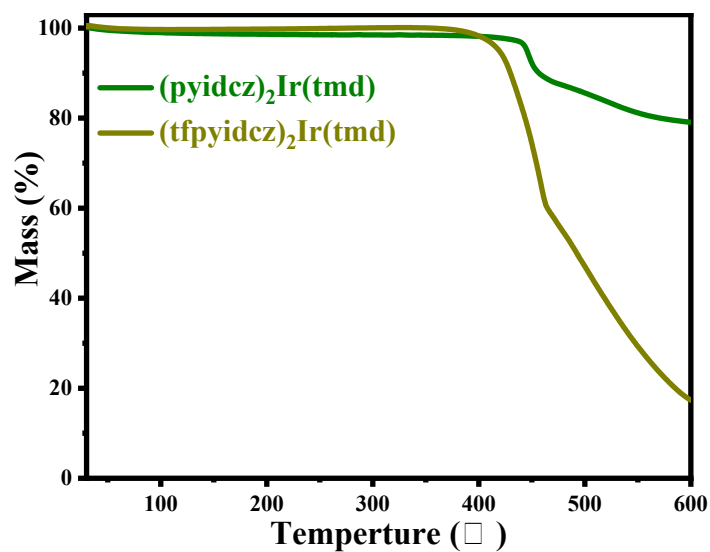

**Fig. S6** TGA curves of (pyidcz)<sub>2</sub>Ir(tmd) and (tfpyidcz)<sub>2</sub>Ir(tmd) complexes.

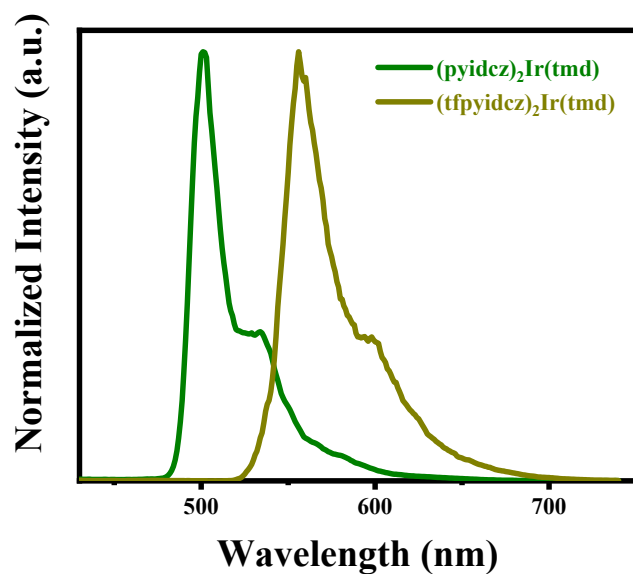

**Fig. S7** The 77 K phosphorescent spectra of  $(\text{pyidcz})_2\text{Ir}(\text{tmd})$  and  $(\text{tfpyidcz})_2\text{Ir}(\text{tmd})$  in dilute DCM ( $10^{-5}$  M).

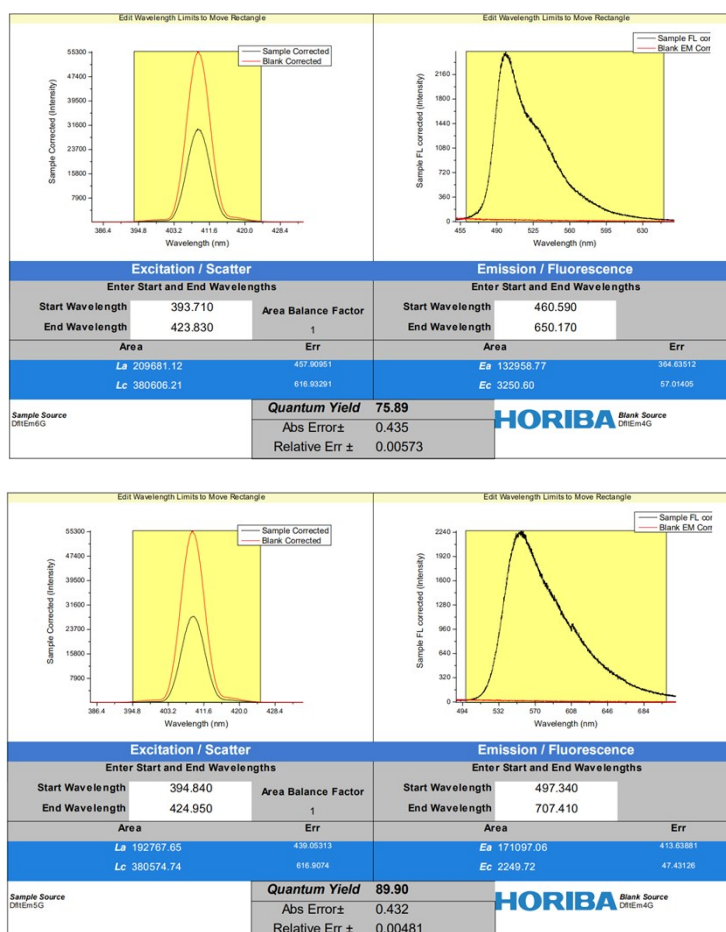

**Fig. S8** The photoluminescence quantum yields of  $(\text{pyidcz})_2\text{Ir}(\text{tmd})$  and  $(\text{tfpyidcz})_2\text{Ir}(\text{tmd})$  in dilute DCM ( $10^{-5}$  M).



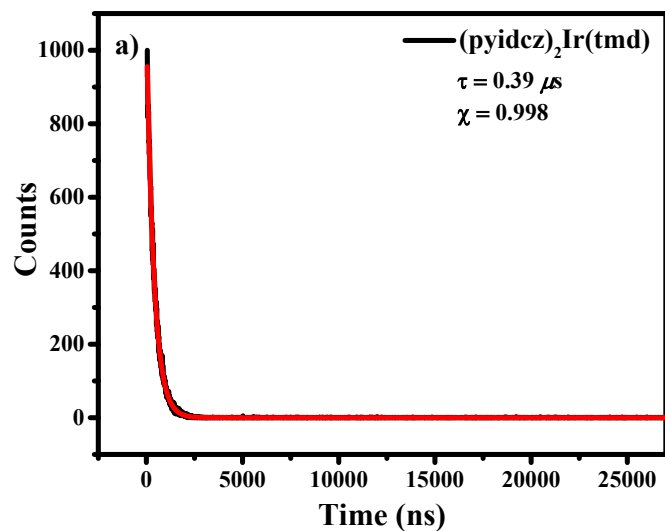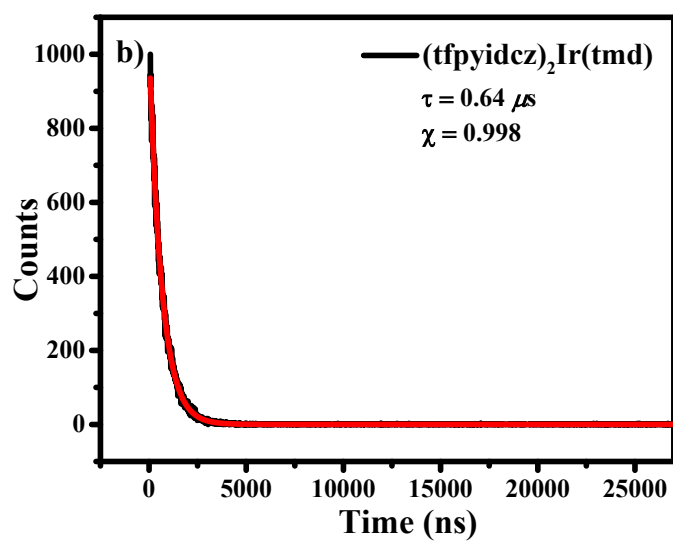

**Fig. S9.** Phosphorescence lifetime curves of the Ir(III) complexes in dilute DCM ( $10^{-5}$  M) at RT.

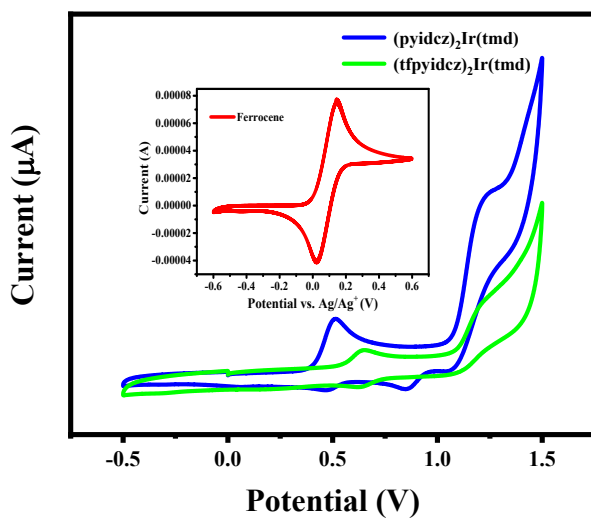

**Fig. S10** Cyclic voltammetry curves of  $(\text{pyidcz})_2\text{Ir}(\text{tmd})$  and  $(\text{tfpyidcz})_2\text{Ir}(\text{tmd})$  in acetonitrile with ferrocene as the internal standard.
